# Supplementary material for: Frailty Changes After Liver Transplantation. Results From a Spanish Multicenter Prospective Cohort Study
Source: PubMed Central journal article supplement — Transplant Direct. 2024 Mar 22;10(4):e1599. doi: 10.1097/TXD.0000000000001599 (PMC10962876; doi:10.1097/txd.0000000000001599), 2024-03-22
Supplement: txd-10-e1599-s001.pdf [file txd-10-e1599-s001.pdf]

**SUPPLEMENTARY MATERIAL**

**TABLE S1:** Overall changes in frailty category based on the Liver Frailty Index and the Subjective Clinician Assessment. at 3- and 6-months after liver transplantation (LT) compared to pretransplant.

| Frailty changes*                                      |             | 3-months post-transplant<br>(n=118) | 6-months post-transplant<br>(n=140) |
|-------------------------------------------------------|-------------|-------------------------------------|-------------------------------------|
| <i>Liver Frailty Index</i>                            |             |                                     |                                     |
| <b>Changes in frailty category compared to pre-LT</b> | Improvement | 29 (25%)                            | 29 (21%)                            |
|                                                       | Stability   | 73 (62%)                            | 101 (72%)                           |
|                                                       | Worsening   | 16 (14%)                            | 10 (7%)                             |
| <i>Subjective Clinician Assessment</i>                |             |                                     |                                     |
| <b>Changes in frailty category compared to pre-LT</b> | Improvement | 46 (39%)                            | 52 (37%)                            |
|                                                       | Stability   | 67 (57%)                            | 82 (59%)                            |
|                                                       | Worsening   | 5 (4%)                              | 6 (4%)                              |

**TABLE S2:** Association between pretransplant frailty (LFI score vs “poor” SCA) and post-transplant outcomes. Results from Cox regression (Hazard ratio-HR-), linear regression (beta coefficient - $\beta$ -) and logistic regression (Odds ratio -OR-), 95% confidence interval (95%CI) and p-value<sup>†</sup>.

| Post-transplant outcomes                                                              | Pretransplant LFI         |           |                  | “Poor” pretransplant SCA  |            |              |
|---------------------------------------------------------------------------------------|---------------------------|-----------|------------------|---------------------------|------------|--------------|
|                                                                                       | $\beta$ coefficient/OR/HR | 95%CI     | p-value          | $\beta$ coefficient/OR/HR | 95%CI      | p-value      |
| <b>Length of intensive care unit stay</b>                                             |                           |           |                  |                           |            |              |
| Univariable                                                                           | $\beta = 1,24$            | 0,70-1,78 | <b>&lt;0,001</b> | $\beta = 2,26$            | 0,89-3,62  | <b>0,001</b> |
| Multivariable*                                                                        | $\beta = 0,85$            | 0,26-1,44 | <b>0,005</b>     | $\beta = 1,11$            | -0,45-2,67 | 0,163        |
| <b>Length of transplant hospitalization</b>                                           |                           |           |                  |                           |            |              |
| Univariable                                                                           | $\beta = 1,69$            | 0,47-2,91 | <b>0,007</b>     | $\beta = 3,20$            | 0,30-6,10  | <b>0,031</b> |
| Multivariable*                                                                        | $\beta = 1,69$            | 0,47-2,91 | <b>0,007</b>     | $\beta = 2,77$            | -0,70-6,23 | 0,117        |
| <b>Early(&lt;30days) post-LT complications</b>                                        |                           |           |                  |                           |            |              |
| Univariable                                                                           | OR=2,05                   | 1,29-3,26 | <b>0,002</b>     | OR=3,46                   | 1,07-11,2  | <b>0,038</b> |
| Multivariable*                                                                        | OR=2,05                   | 1,29-3,26 | <b>0,002</b>     | OR=3,32                   | 1,02-10,8  | <b>0,046</b> |
| <b>Severe (<math>\geq</math> grade IIIA) early post-LT complications<sup>11</sup></b> |                           |           |                  |                           |            |              |
| Univariable                                                                           | OR=1,38                   | 0,80-2,38 | 0,251            | OR=1,29                   | 0,41-4,10  | 0,664        |
| Multivariable*                                                                        | OR=1,31                   | 0,75-2,31 | 0,345            | OR=1,16                   | 0,36-3,78  | 0,802        |
| <b>Late (30-90days) post-LT complications</b>                                         |                           |           |                  |                           |            |              |
| Univariable                                                                           | OR=1,85                   | 1,13-3,03 | <b>0,014</b>     | OR=1,04                   | 0,34-3,20  | 0,943        |
| Multivariable*                                                                        | OR=2,60                   | 1,47-4,59 | <b>0,001</b>     | OR=0,75                   | 0,34-4,55  | 0,745        |
| <b>Retransplant within 6 months post-LT</b>                                           |                           |           |                  |                           |            |              |
| Univariable                                                                           | OR=1,96                   | 0,89-4,31 | 0,095            | OR=1,70                   | 0,47-6,12  | 0,419        |
| Multivariable**                                                                       | -                         | -         | -                | -                         | -          | -            |

| <b>Cardiovascular events within 6 months post-LT</b> |                    |                        |                |         |           |       |
|------------------------------------------------------|--------------------|------------------------|----------------|---------|-----------|-------|
| Univariable                                          | OR=1,69            | 0,70-4,10              | 0,243          | OR=2,82 | 0,48-16,6 | 0,251 |
| Multivariable**                                      | -                  | -                      | -              | -       | -         | -     |
| <b>Death within 6 months post-LT</b>                 |                    |                        |                |         |           |       |
| Univariable                                          | OR=1,46<br>HR=1,14 | 0,73-2,90<br>0,54-2,42 | 0,283<br>0,730 | OR=1,35 | 0,26-6,93 | 0,717 |
| Multivariable**                                      | -                  | -                      | -              | -       | -         | -     |

† Adapted from *Puchades L. et al, JHEP Reports*, <https://doi.org/10.1016/j.jhepr.2023.100840>. Values in bold denote statistically significant results (p <0.05).

\* Multivariable adjustment for covariables associated with frailty status in univariable analysis (MELD-Na and Child-Pugh scores at transplant, recipient age, female sex, and cardiovascular risk factors).

\*\*Results from univariable models concluded there were no significant variables to adjust for in multivariable analysis.

**TABLE S3:** Association between pretransplant “poor” SCA and waitlist mortality. Results from Cox regression (Hazard ratio-HR-), 95% confidence interval (95%CI) and p-value<sup>†</sup>.

| Waitlist mortality*                      | Hazard ratio | IC 95%    | Valor-p      |
|------------------------------------------|--------------|-----------|--------------|
| <i>pretransplant SCA</i>                 |              |           |              |
| <b><i>Univariable</i></b>                |              |           |              |
| “Good-Fair” SCA                          | HR=1         | -         | -            |
| “Poor” SCA                               | HR= 9,35     | 1,55-56,2 | <b>0,015</b> |
| <b><i>Multivariable</i></b> <sup>∧</sup> |              |           |              |
| “Good-Fair” SCA                          | HR=1         | -         | -            |
| “Poor” SCA                               | HR=9,46      | 1,04-86,4 | <b>0,047</b> |

<sup>†</sup> Unpublished results from a multicentre Spanish cohort of 212 patients with cirrhosis awaiting liver transplantation enrolled between November 2018 and December 2020, with at least 1 SCA while on the waiting list. Values in bold denote statistically significant results (p <0.05).

\* Waitlist mortality was defined as a combined outcome of death or delisting for being too sick for liver transplantation. Results of Cox regression models where “good” and “fair” pretransplant assessments were added and then compared to “poor” pretransplant assessments.

<sup>∧</sup> Multivariable adjustment for age and MELD score,

**FIGURE S1:** Categories of the Liver Frailty Index (LFI) and the Subjective Clinician Assessment (SCA) among patients with hepatocellular carcinoma -HCC- (A) and without HCC (B) both before and after liver transplantation (LT)\*.

A)

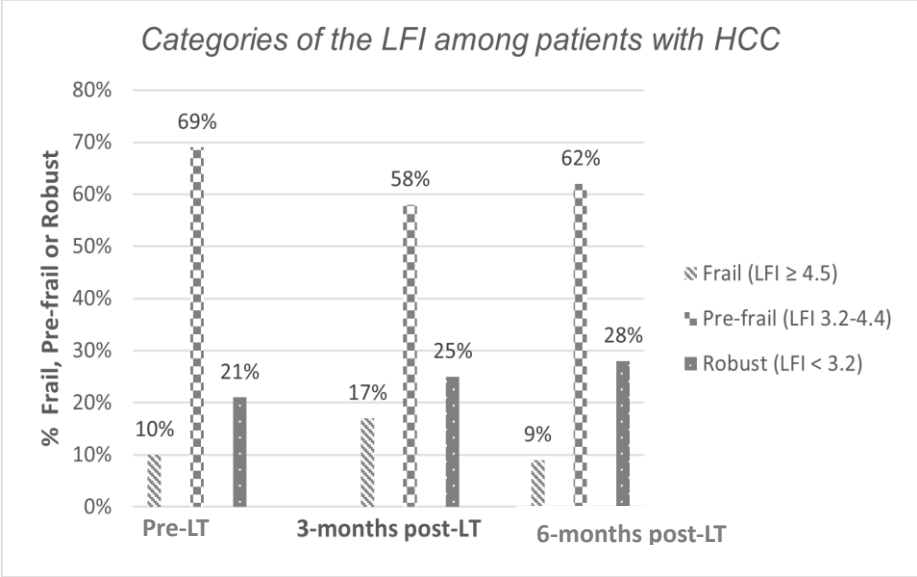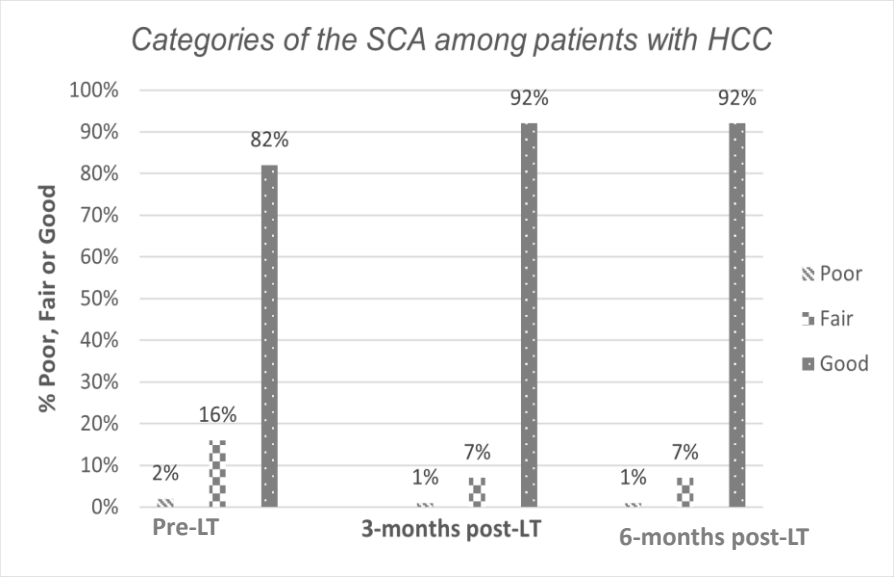

**B)**

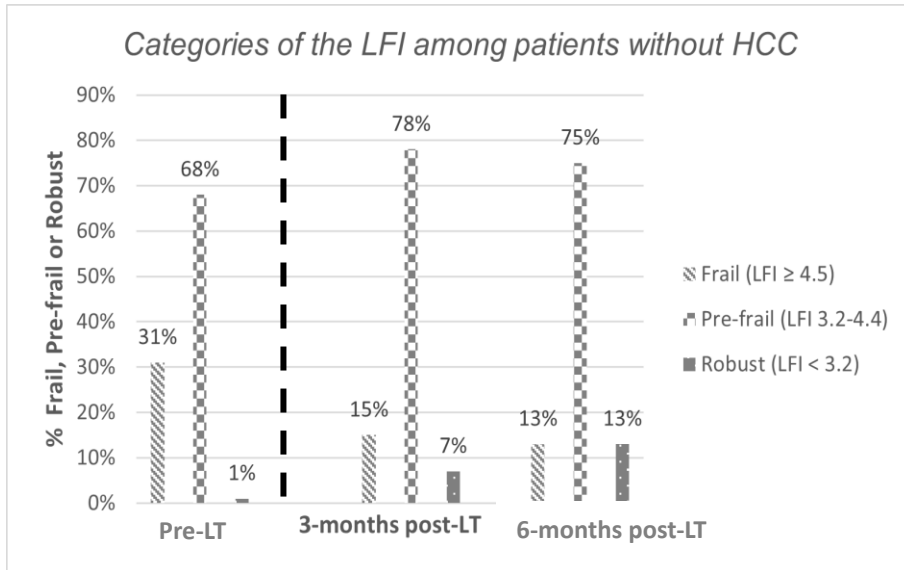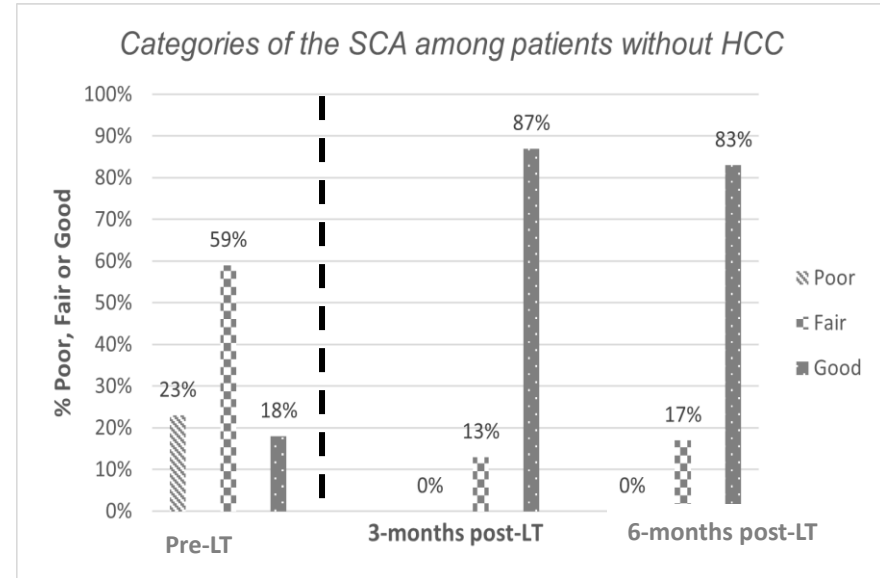

\*Adapted from Lai JC et al. *Am J Transplant.* 2018 August; 18(8): 1986–1994.
